# Supplementary material for: Enhanced luminescence in multivariate metal–organic frameworks through an isolated-ligand strategy
Source: Royal Society of Chemistry journal article supplement (doi:10.1039/d2tc01949c), 2022-01-01
Supplement: d2tc01949c1.pdf [file d2tc01949c1.pdf]

**Enhanced Luminescence in Multivariate Metal-Organic Frameworks through  
Isolated-Ligand Strategy**

*Ziwei Jiang, He-Qi Zheng, Lingling Guan, Yu Yang, Yuanjing Cui\*, and Guodong  
Qian\**

*State Key Laboratory of Silicon Materials, Cyrus Tang Center for Sensor Materials  
and Applications, School of Materials Science & Engineering, Zhejiang University,  
Hangzhou 310027, China.*

\*Author to whom correspondence may be addressed: [cuiyj@zju.edu.cn](mailto:cuiyj@zju.edu.cn);  
[gdqian@zju.edu.cn](mailto:gdqian@zju.edu.cn)

**1. Figure.**

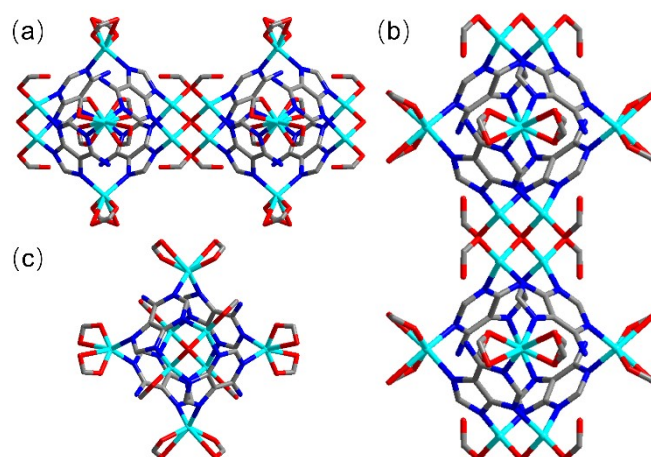

**Figure S1.** The SBUs of ZJU-235 viewed along the (a) *a* direction, (b) *b* direction and (c) *c* direction. Light blue, dark blue, red, and gray represent Zn, N, O and C atoms, respectively.

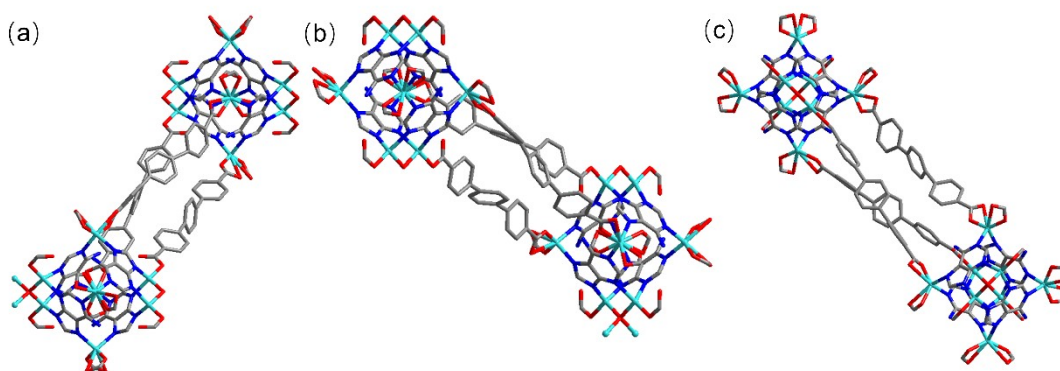

**Figure S2.** The connection characteristics of organic ligands and the SBUs in ZJU-235 viewed along the (a) *a* direction, (b) *b* direction and (c) *c* direction. Light blue, dark blue, red, and gray represent Zn, N, O and C atoms, respectively.

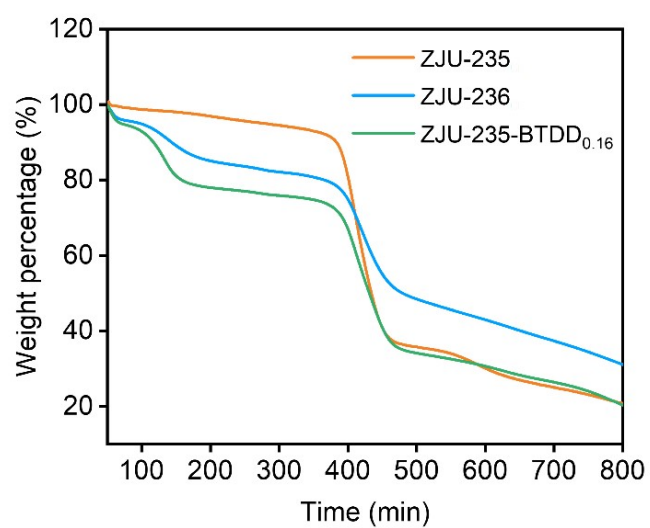

**Figure S3.** TGA of ZJU-235, ZJU-236 and ZJU-235-BTDD<sub>0.16</sub>.

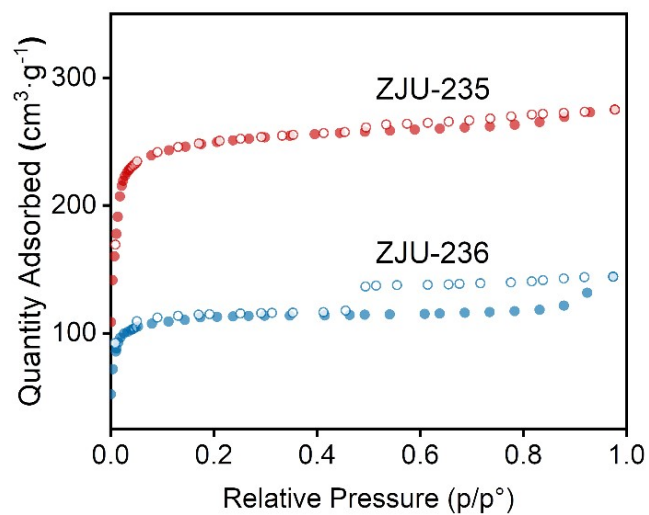

**Figure S4.** N<sub>2</sub> adsorption (filled) and desorption (empty) isotherms (77 K) for ZJU-235 and ZJU-236.

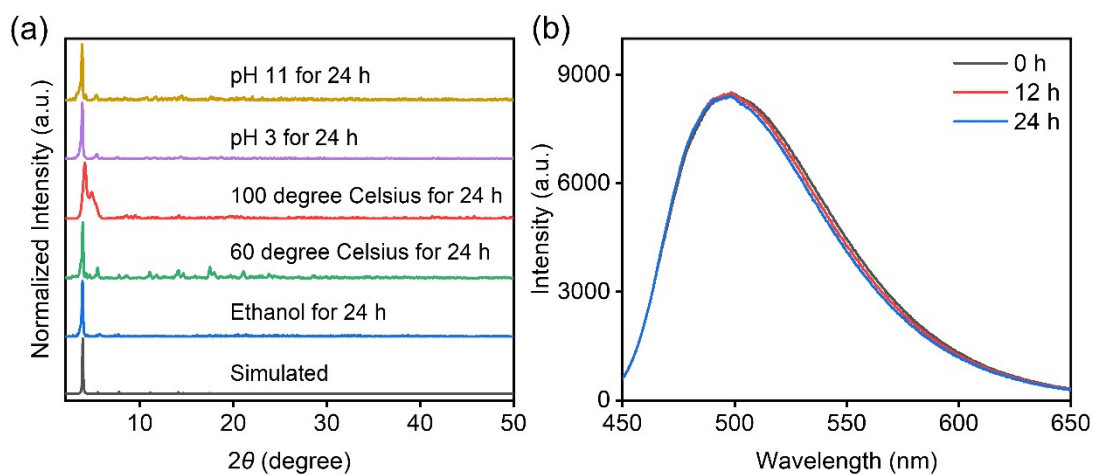

**Figure S5.** (a) PXRD patterns of ZJU-235 after different treatment conditions. (b) PL spectra of ZJU-235-BTDD<sub>0.02</sub> after being placed in the air for 0, 12 or 24 hours at room temperature.

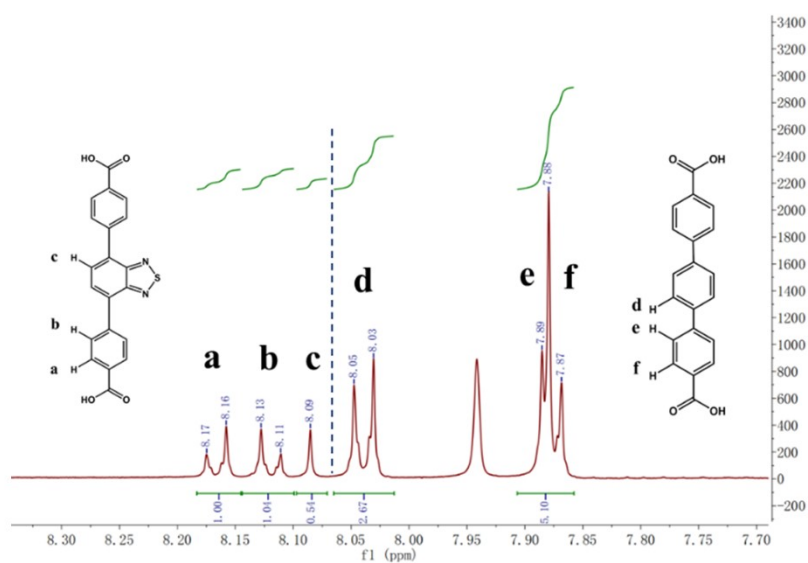

**Figure S6.** <sup>1</sup>H NMR of digested ZJU-235-BTDD with HNO<sub>3</sub> in DMSO-d<sub>6</sub>.

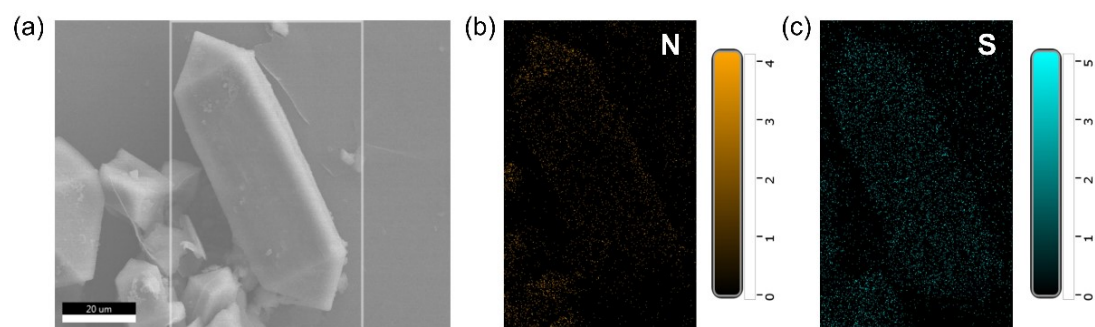

**Figure S7.** (a) SEM image and (b) N, (c) S element EDS mapping of ZJU-235-BTDD<sub>0.16</sub>.

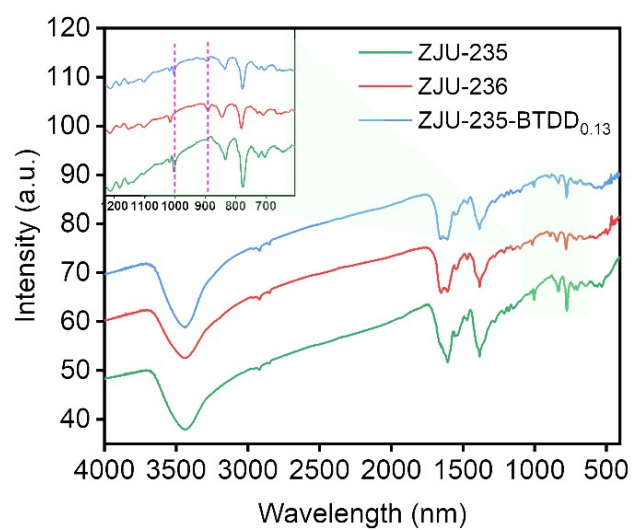

**Figure S8.** FT-IR spectra of ZJU-235, ZJU-236 and ZJU-235-BTDD<sub>0.13</sub>.

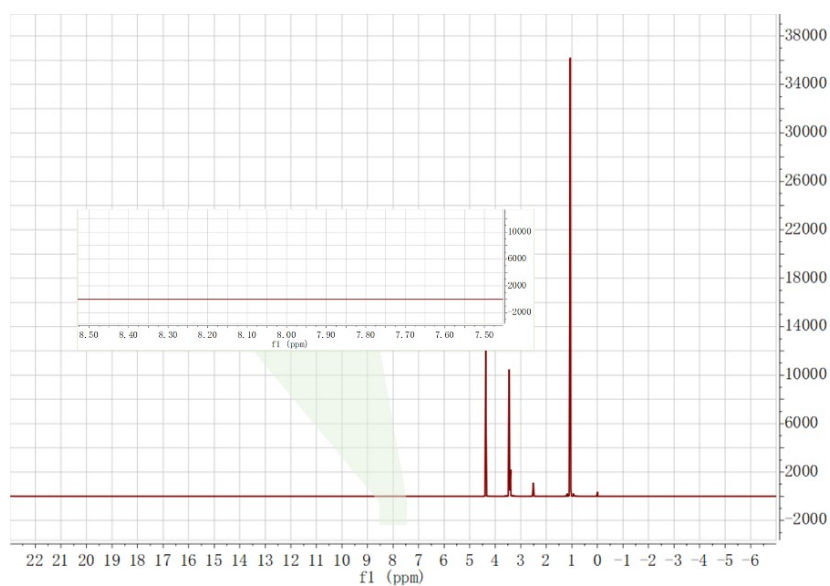

**Figure S9.**  $^1\text{H}$  NMR spectra of the eluate for ZJU-235-BTDD<sub>0.16</sub> after washing with ethanol and deionized water three times.

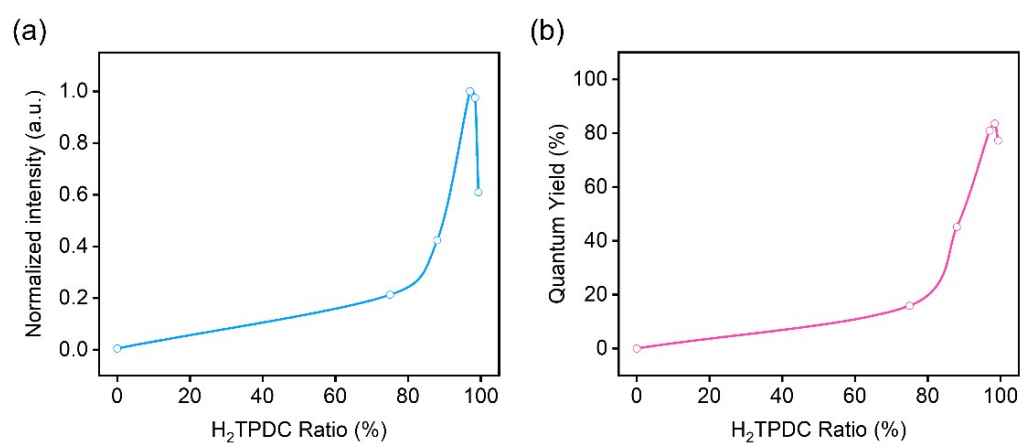

**Figure S10.** (a) Fluorescence intensity (excited at the optimum excitation wavelength, respectively) and (b) QY as a function of feeding ratio H<sub>2</sub>BTDD.

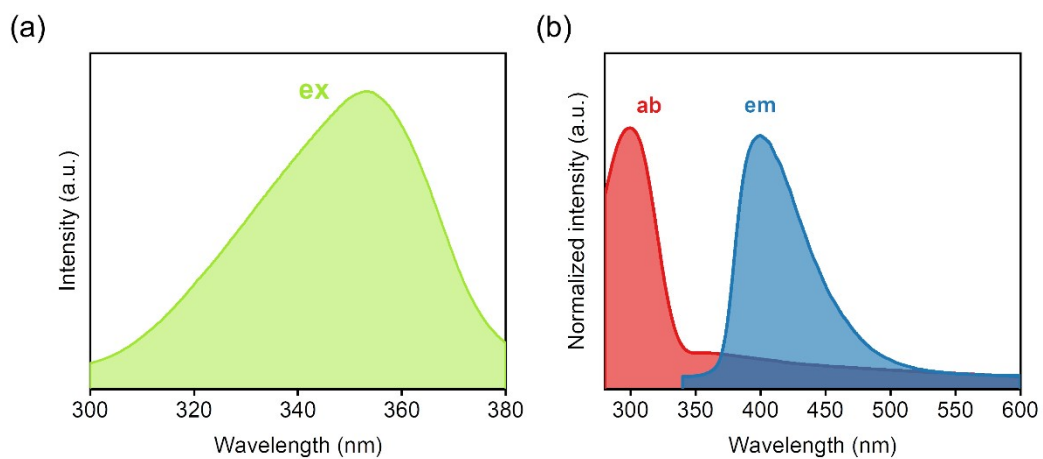

**Figure S11.** (a) Excitation spectra, (b) absorption spectra (1 mg in 1 mL DMF) and emission spectra of ZJU-235.

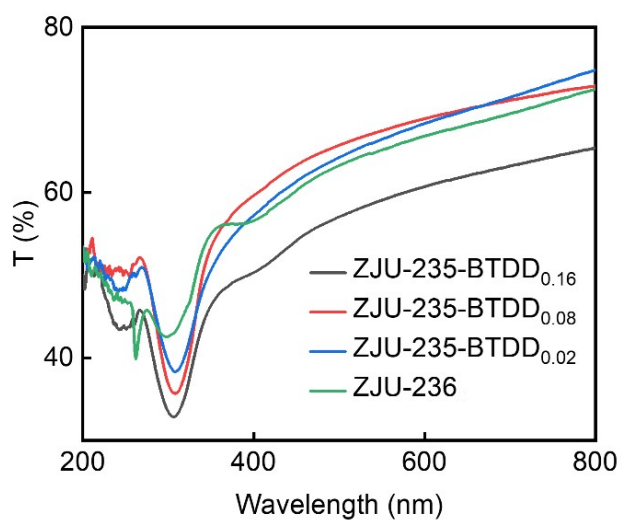

**Figure S12.** Absorption spectra (0.1 mg in 1 mL DMF) of ZJU-236 and ZJU-235-BTDD<sub>x</sub> ( $x = 0.02, 0.08, 0.16$ ).

## 2. Table

**Table S1.** Crystallographic Data collection and Refinement result for ZJU-235.

| <b>ZJU-235</b>                                                                                                    |                                                                                  |
|-------------------------------------------------------------------------------------------------------------------|----------------------------------------------------------------------------------|
| CCDC No.                                                                                                          | 2089981                                                                          |
| Chemical formula                                                                                                  | C <sub>100</sub> H <sub>56</sub> N <sub>20</sub> O <sub>17</sub> Zn <sub>8</sub> |
| Formula weight                                                                                                    | 2332.60                                                                          |
| Temperature (K)                                                                                                   | 298(2)                                                                           |
| Wavelength (Å)                                                                                                    | 1.54178                                                                          |
| Crystal system                                                                                                    | Tetragonal                                                                       |
| Space group                                                                                                       | <i>P4/nbm</i>                                                                    |
| <i>a</i> (Å)                                                                                                      | 32.1500(6)                                                                       |
| <i>b</i> (Å)                                                                                                      | 32.1500(6)                                                                       |
| <i>c</i> (Å)                                                                                                      | 11.1411(3)                                                                       |
| $\alpha$ (°)                                                                                                      | 90                                                                               |
| $\beta$ (°)                                                                                                       | 90                                                                               |
| $\gamma$ (°)                                                                                                      | 90                                                                               |
| <i>V</i> (Å <sup>3</sup> )                                                                                        | 11515.7(5)                                                                       |
| <i>Z</i>                                                                                                          | 2                                                                                |
| Density (calculated g·cm <sup>-3</sup> )                                                                          | 0.673                                                                            |
| Absorbance coefficient (mm <sup>-1</sup> )                                                                        | 1.181                                                                            |
| <i>F</i> (000)                                                                                                    | 2344                                                                             |
| <i>R</i> <sub>int</sub>                                                                                           | 0.1302                                                                           |
| Goodness of fit on <i>F</i> <sup>2</sup>                                                                          | 1.043                                                                            |
| <i>R</i> 1, <i>wR</i> 2 ( <i>I</i> > 2σ( <i>I</i> )) <sup>a</sup>                                                 | 0.1275, 0.3184                                                                   |
| <i>R</i> 1, <i>wR</i> 2 (all data) <sup>a</sup>                                                                   | 0.1609, 0.3351                                                                   |
| Largest difference peak and hole (e/Å <sup>3</sup> )                                                              | 0.772, -0.635                                                                    |
| $R1 = \frac{\sum   F_o  -  F_c  }{\sum  F_o } ; wR2 = \sqrt{\frac{\sum w( F_o ^2 -  F_c ^2)^2}{\sum w(F_o^2)^2}}$ |                                                                                  |
| a.                                                                                                                |                                                                                  |

**Table S2.** Element analysis results of ZJU-235.

| Element           | C     | N    | H    |
|-------------------|-------|------|------|
| Mass fraction (%) | 46.18 | 9.02 | 3.98 |

**Table S3.** QY results of H<sub>2</sub>BTDD ligand.

| State of matter             | QY (%) | Scatter Range (nm) | Emission Range (nm) |
|-----------------------------|--------|--------------------|---------------------|
| Solid                       | 2.00   | 392.5~407.5        | 447.0~650.0         |
| Solution (5 $\mu$ M in DMF) | 7.46   | 374.5~386.0        | 386.5~650.0         |

**Table S4.** The original molar ratio and the actual molar ratio of H<sub>2</sub>BTDD/H<sub>2</sub>TPDC in ZJU-235-BTDD<sub>x</sub> confirmed by <sup>1</sup>H NMR.

| Sample                       | The feeding ratio | The real molar ratio |
|------------------------------|-------------------|----------------------|
| ZJU-235-BTDD <sub>0.02</sub> | 0.03:0.97         | 0.02:0.98            |
| ZJU-235-BTDD <sub>0.08</sub> | 0.12:0.88         | 0.08:0.92            |
| ZJU-235-BTDD <sub>0.16</sub> | 0.25:0.75         | 0.16:0.84            |

**Table S5.** QY of ZJU-235 and ZJU-236.

| Sample  | QY     |
|---------|--------|
| ZJU-235 | 32.17% |
| ZJU-236 | ~0.00% |
